# Supplementary material for: Genome-wide association studies provide insights into the genetic determination of fruit traits of pear
Source: PubMed Central journal article supplement (PMC7892570; doi:10.1038/s41467-021-21378-y), 2021-02-18
Supplement: 41467_2021_21378_MOESM3_ESM.pdf [file 41467_2021_21378_MOESM3_ESM.pdf]

## **Description of Additional Supplementary Files**

Supplementary Data 1. Summary statistics of sequencing and mapping for 312 pear accessions

Supplementary Data 2. NGS and Sanger sequencing to validate SNP calling

Supplementary Data 3. Candidate selective sweep regions

Supplementary Data 4. Genes in the selective sweep regions

Supplementary Data 5. Phenotypic data of eleven fruit traits in sand pears

Supplementary Data 6. Main candidate regions for pear fruit traits based on GWAS

Supplementary Data 7. GWAS predicted candidate genes

Supplementary Data 8. Primers used in gene function validation
