# Supplementary material for: Genome-wide association studies provide insights into the genetic determination of fruit traits of pear
Source: Nat Commun. 2021 Feb 18;12:1144. doi: 10.1038/s41467-021-21378-y (PMC7892570; doi:10.1038/s41467-021-21378-y)
Supplement: Supplementary file 1 — Supplementary Information [file 41467_2021_21378_MOESM1_ESM.pdf]

**Genome-wide association studies provide insights into the genetic  
determination of fruit traits of pear**

*Zhang et al.*

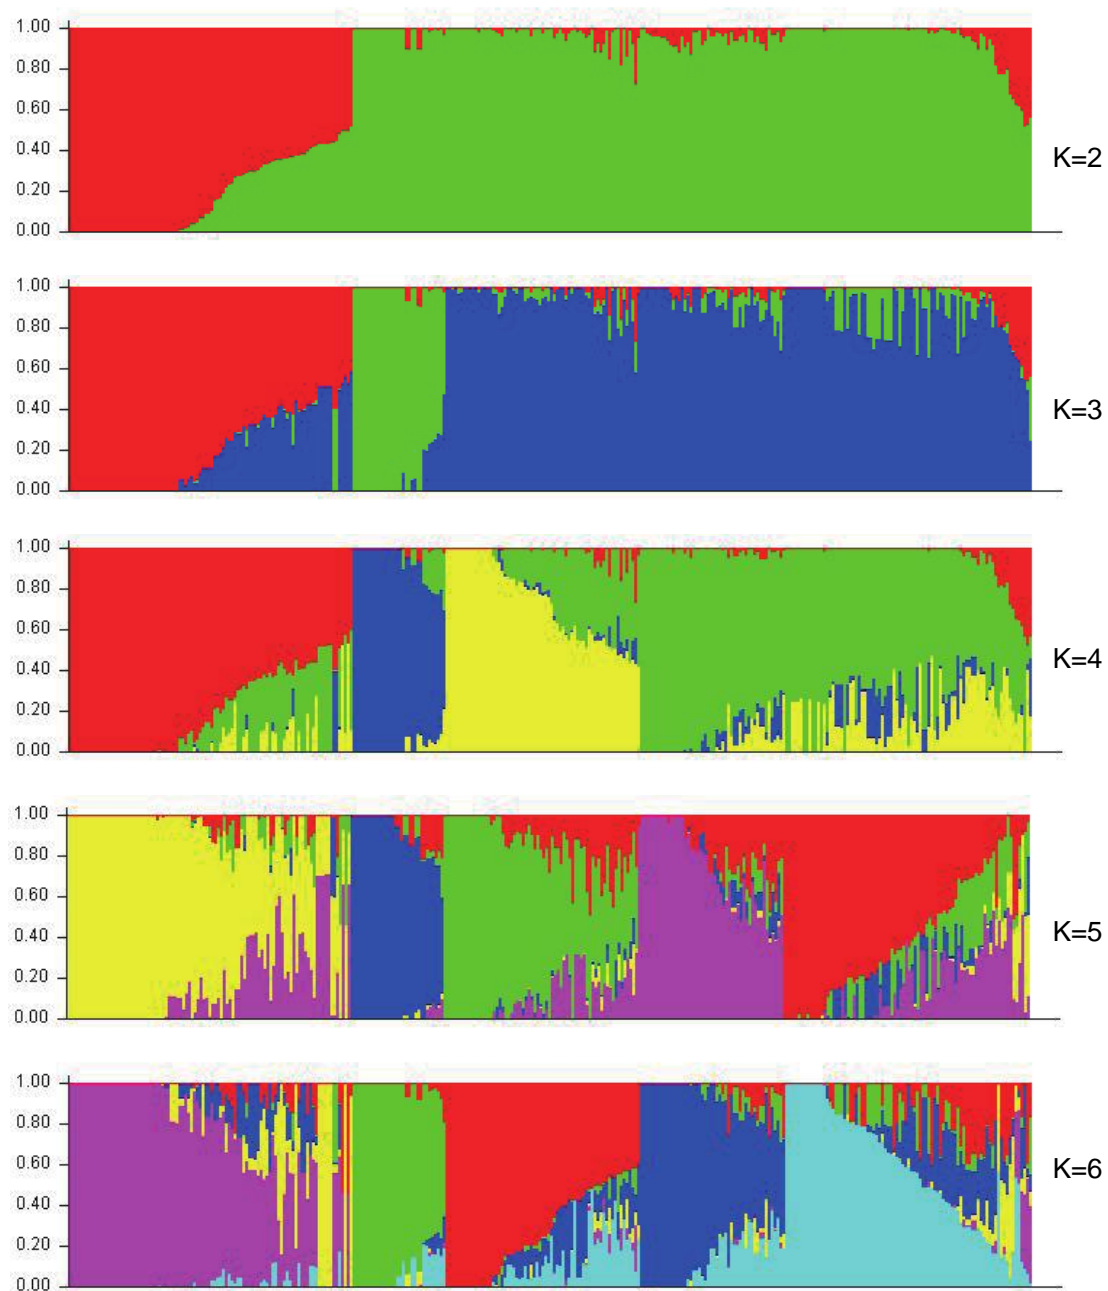

**Supplementary Figure 1.** Population structure of 312 sand pears with  $K$  values ranging from 2 to 6. Source data are provided as a Source Data file.

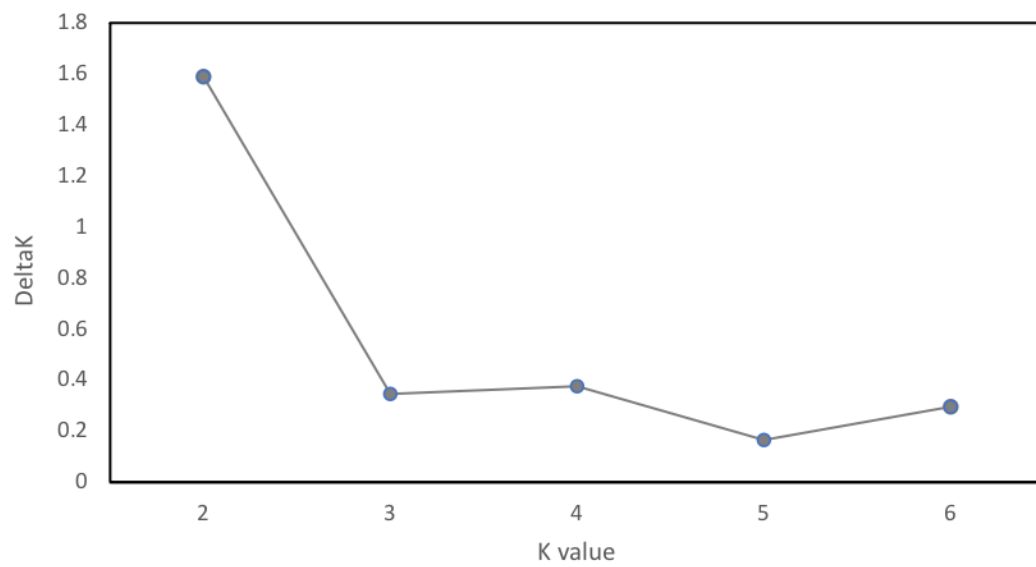

**Supplementary Figure 2.** DeltaK calculated with  $K$  from 2 to 6.

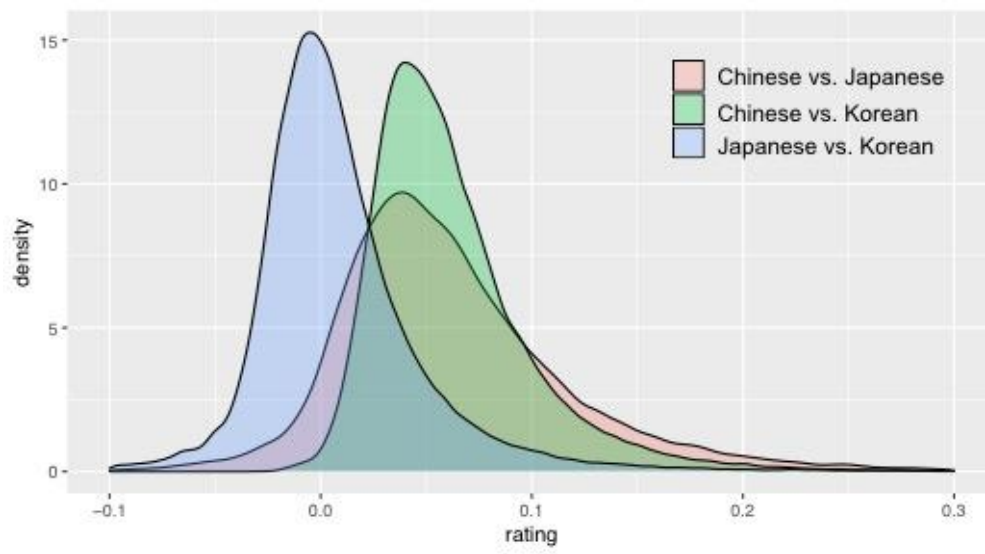

**Supplementary Figure 3.**  $F_{ST}$  between sand pears from different regions.

a

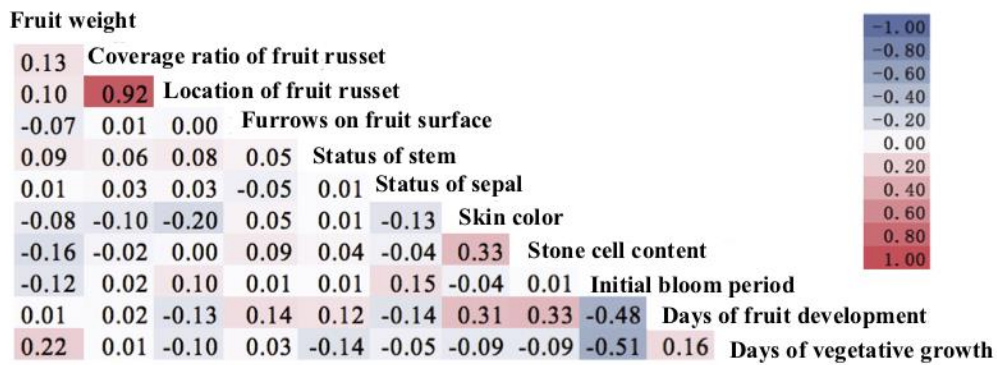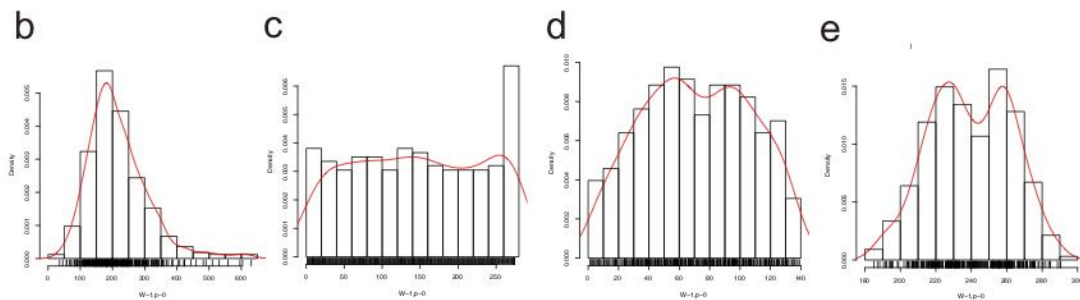

**Supplementary Figure 4.** Correlation and distribution of phenotypes in sand pears. **a.** Correlation of all the traits in sand pears. Values indicated correlation coefficients ( $r$ ) between two traits. **b.** Distribution of single fruit weight in 312 sand pears. **c.** Distribution of stone cell content. **d.** Distribution of days of fruit development. **e.** Distribution of days of vegetative growth. Source data are provided as a Source Data file.

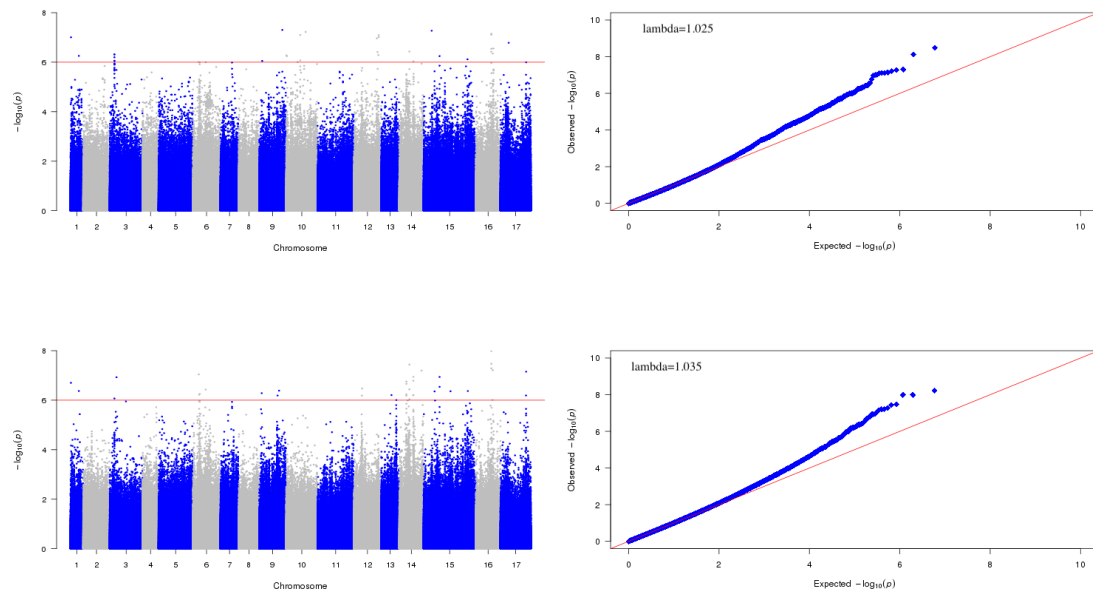

**Supplementary Figure 5.** Manhattan and Quantile-Quantile plot of GWAS for single fruit weight. Figures on the top and the bottom are Manhattan plots and Quantile-Quantile plots generated using TASSEL and EMMAX, respectively.

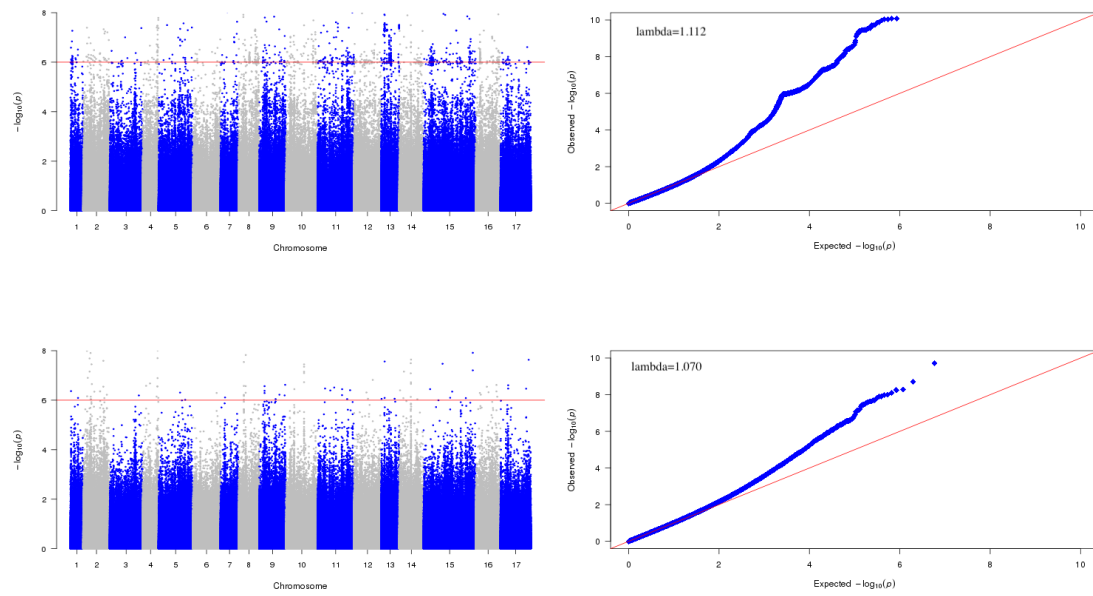

**Supplementary Figure 6.** GWAS and Quantile-Quantile plot of stone cells content. Figures on the top and the bottom are Manhattan plots and Quantile-Quantile plots generated using TASSEL and EMMAX, respectively.

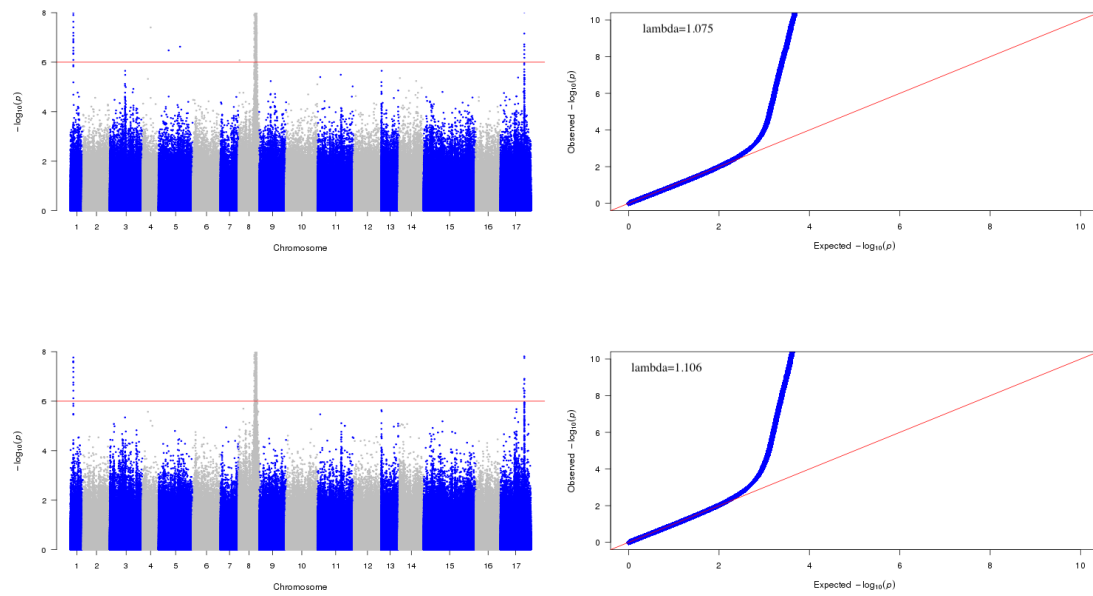

**Supplementary Figure 7.** GWAS and Quantile-Quantile plot of pear fruit skin color. Figures on the top and the bottom are Manhattan plots and Quantile-Quantile plots generated using TASSEL and EMMAX, respectively.

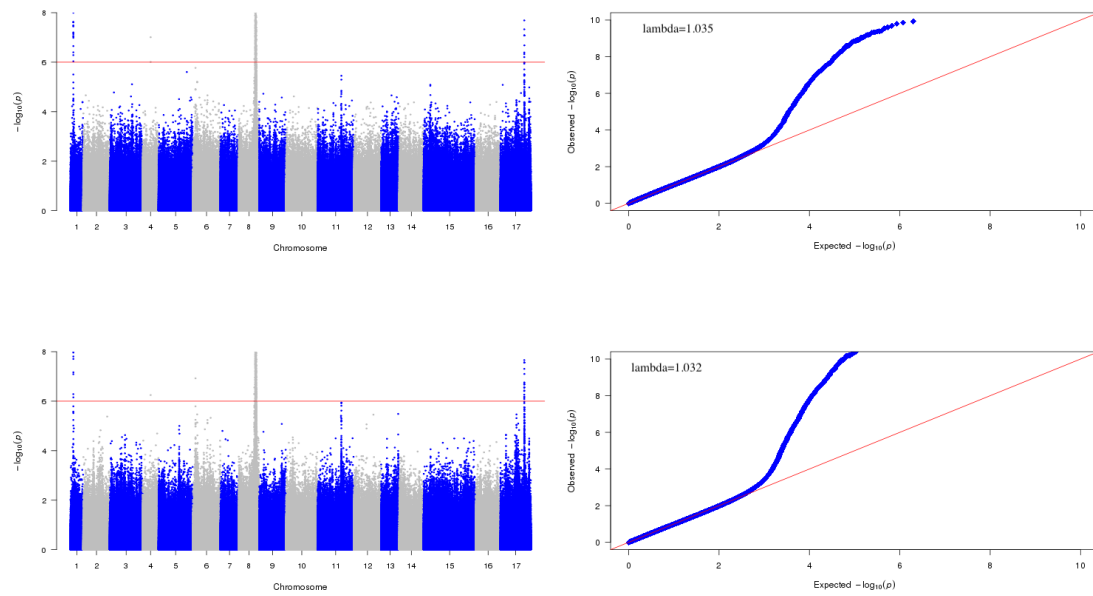

**Supplementary Figure 8.** GWAS and Quantile-Quantile plot of coverage ratio of fruit russet. Figures on the top and the bottom are Manhattan plots and Quantile-Quantile plots generated using TASSEL and EMMAX, respectively.

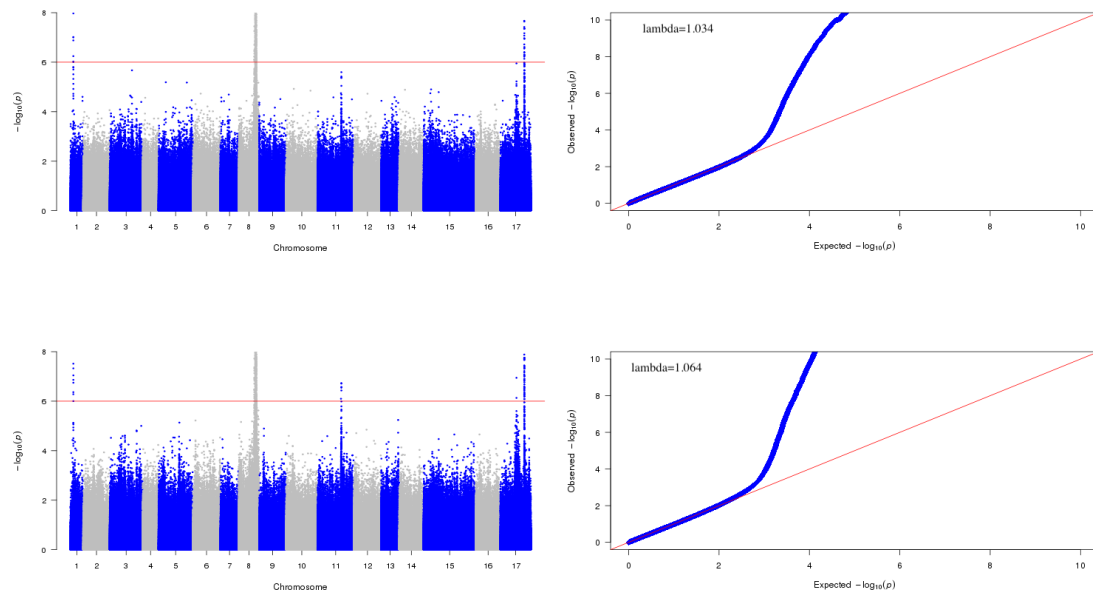

**Supplementary Figure 9.** GWAS and Quantile-Quantile plot of location of fruit russet. Figures on the top and the bottom are Manhattan plots and Quantile-Quantile plots generated using TASSEL and EMMAX, respectively.

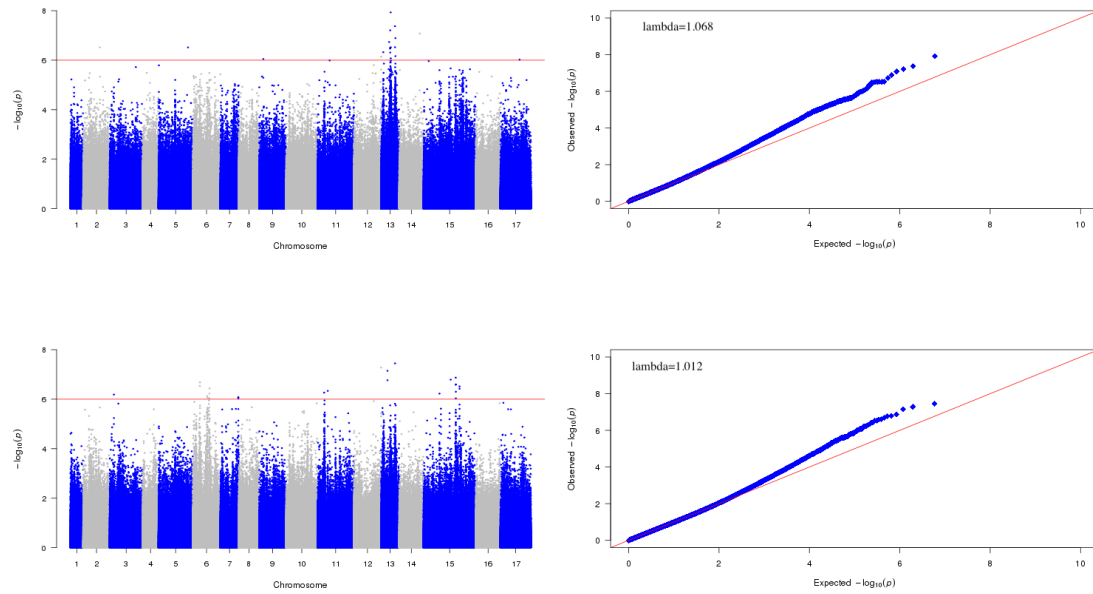

**Supplementary Figure 10.** GWAS and Quantile-Quantile plot of furrows on fruit surface. Figures on the top and the bottom are Manhattan plots and Quantile-Quantile plots generated using TASSEL and EMMAX, respectively.

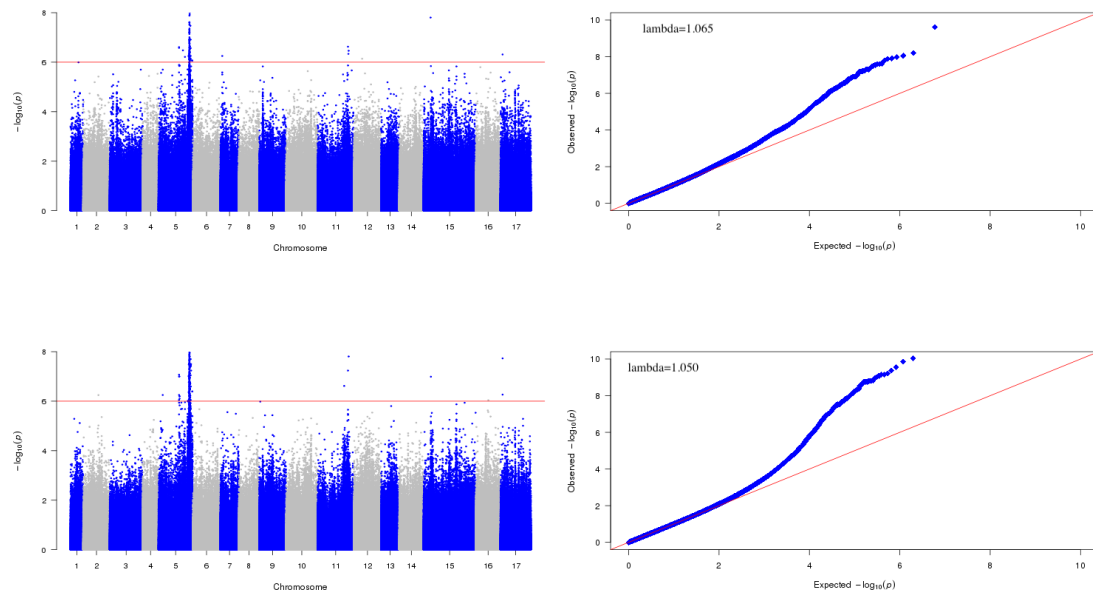

**Supplementary Figure 11.** GWAS and Quantile-Quantile plot for direction of carpopodium. Figures on the top and the bottom are Manhattan plots and Quantile-Quantile plots generated using TASSEL and EMMAX, respectively.

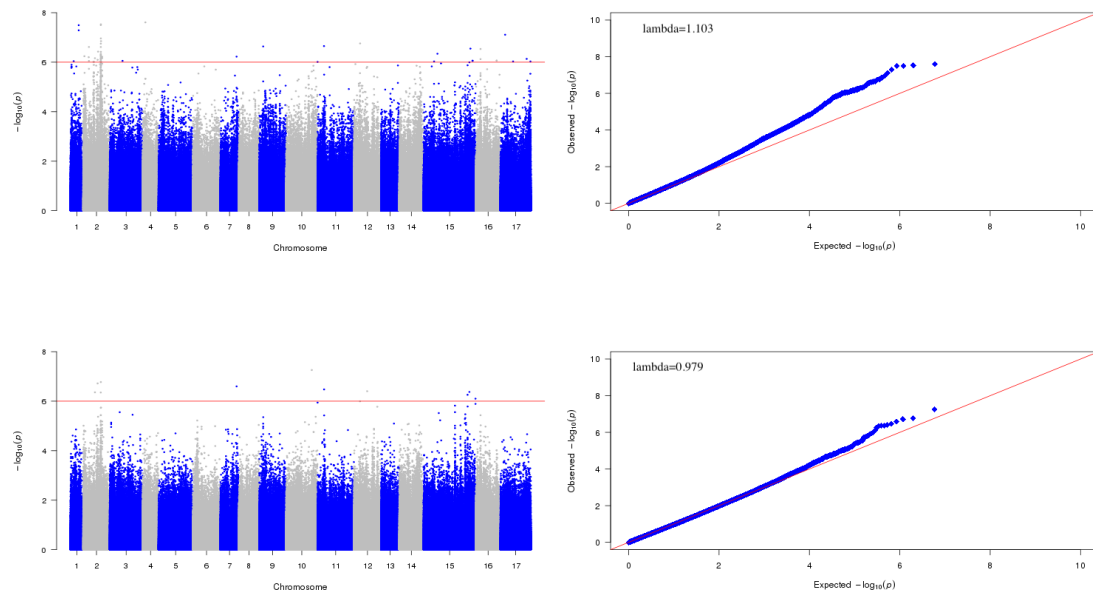

**Supplementary Figure 12.** GWAS and Quantile-Quantile plot for direction of sepal. Figures on the top and the bottom are Manhattan plots and Quantile-Quantile plots generated using TASSEL and EMMAX, respectively.

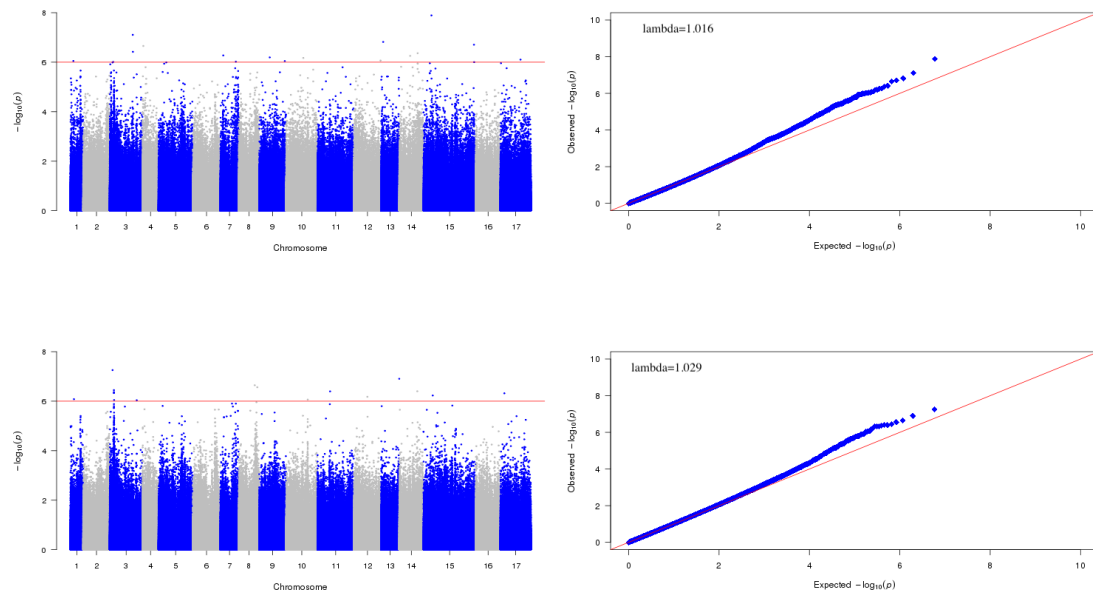

**Supplementary Figure 13.** GWAS and Quantile-Quantile plot for days of fruit development. Figures on the top and the bottom were Manhattan plots and Quantile-Quantile plots generated using TASSEL and EMMAX, respectively.

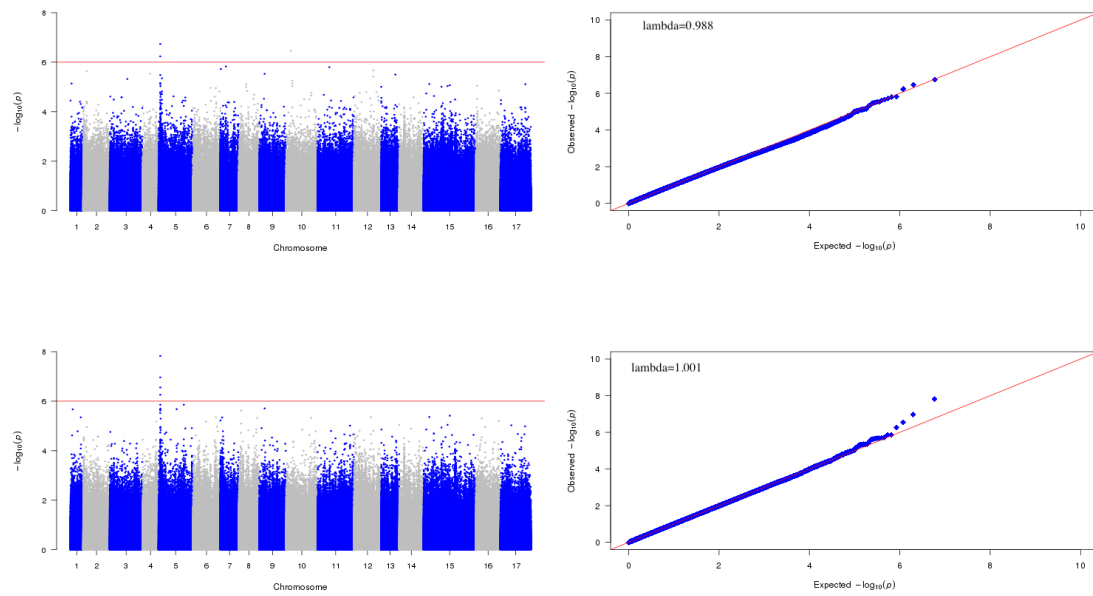

**Supplementary Figure 14.** GWAS and Quantile-Quantile plot for days of vegetative growth. Figures on the top and the bottom are Manhattan plots and Quantile-Quantile plots generated using TASSEL and EMMAX, respectively.

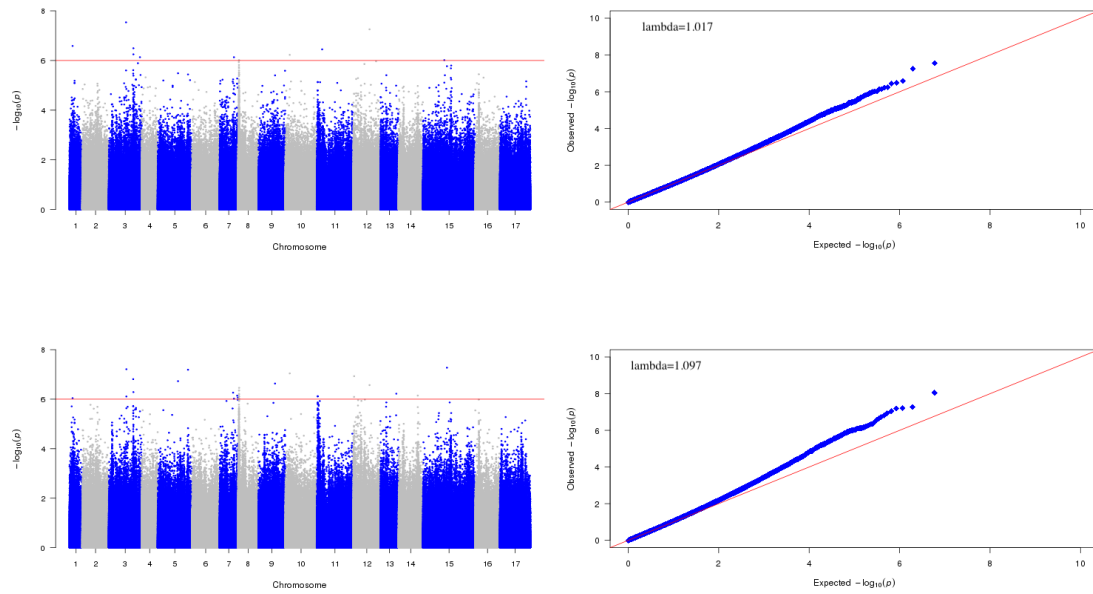

**Supplementary Figure 15.** GWAS and Quantile-Quantile plot of initial bloom period. Figures on the top and the bottom are Manhattan plots and Quantile-Quantile plots generated using TASSEL and EMMAX, respectively.

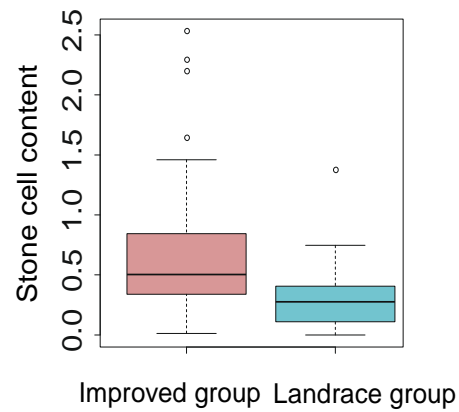

**Supplementary Figure 16.** Stone cell contents in landrace (n=231) and improved (n=81) groups. For each box plot, the lower and upper bounds of the box indicate the first and third quartiles, respectively, and the center line indicates the median. The whisker represents  $1.5 \times$  interquartile range of the lower or upper quartile.

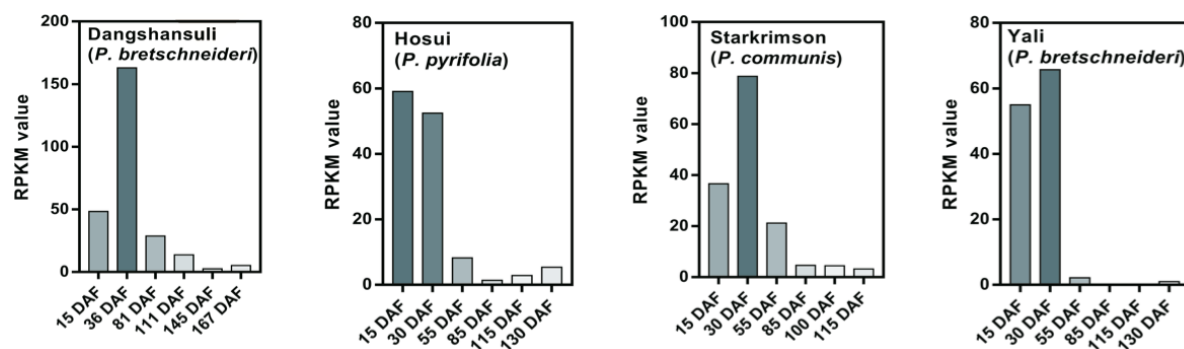

**Supplementary Figure 17.** Expression profiles of *PbrSTONE* during fruit development in four pear cultivars (‘Dangshansuli’, ‘Hosui’, ‘Starkrimson’, and ‘Yali’). Source data are provided as a Source Data file.

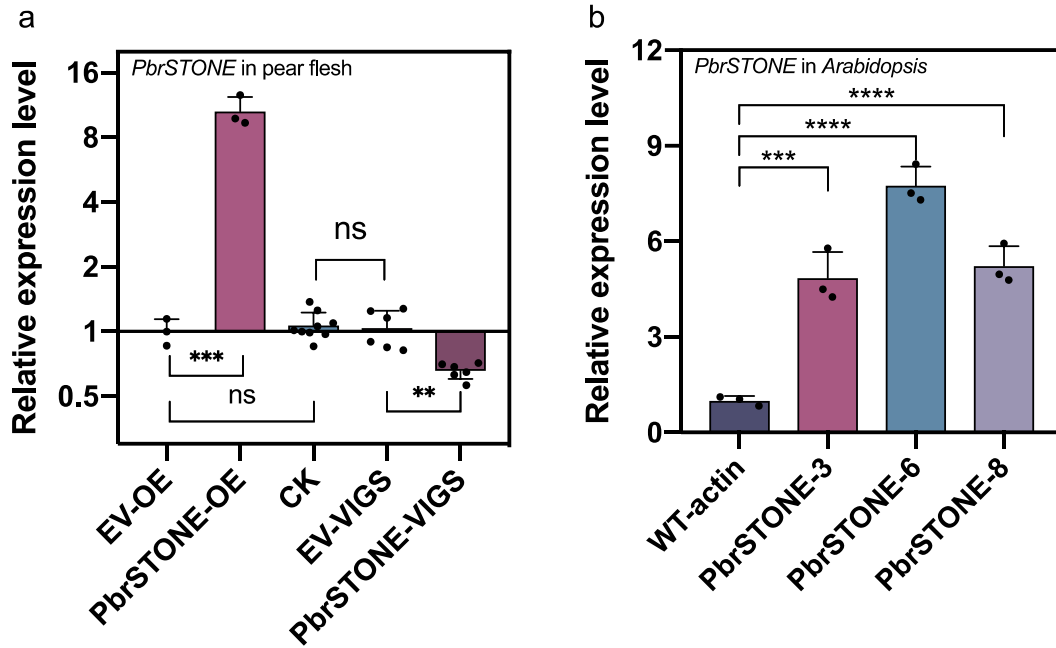

**Supplementary Figure 18.** Expression levels of *PbrSTONE* in transgenic pear and *Arabidopsis*. **a.** Relative expression levels of *PbrSTONE* in the flesh tissue around the infiltration sites with empty vector (*EV-OE* and *EV-VIGS*), *PbrSTONE* overexpression construct (*PbrSTONE-OE*), *PbrSTONE* silencing construct (*PbrSTONE-VIGS*) and non-infiltrated site (CK).  $n=3, 3, 9, 6$  and  $6$  biologically independent samples for *EV-OE*, *PbrSTONE-OE*, CK, *EV-VIGS* and *PbrSTONE-VIGS*, respectively. **b.** *PbrSTONE* expression levels in wild type and transgenic *Arabidopsis* lines overexpressing *PbrSTONE*.  $n=3$  biologically independent samples. Data presented are mean  $\pm$  SD.  $p$ -values were determined by two-tailed Student's  $t$ -test (\*\* $p < 0.01$ , \*\*\* $p < 0.001$ , \*\*\*\* $p < 0.0001$ ; ns, not significant). Source data are provided as a Source Data file.

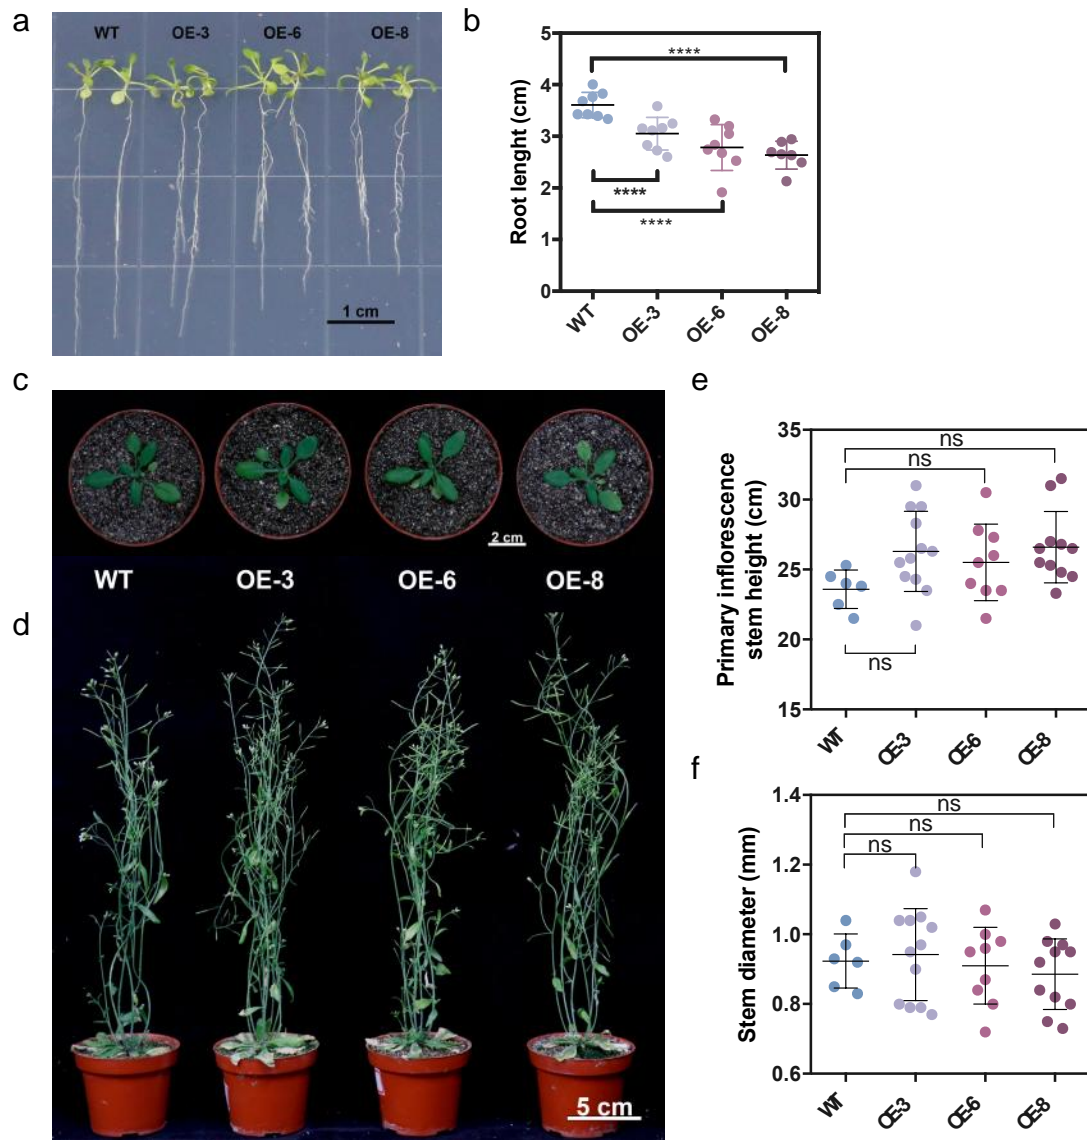

**Supplementary Figure 19.** Phenotype of the transgenic *Arabidopsis* overexpressing *PbrSTONE*. **a-b**. Root length of WT and *PbrSTONE*-overexpression *Arabidopsis* plants. n=8, 8, 8 and 7 biologically independent samples for WT, OE-3, OE-6 and OE-8, respectively. **c-f**. Primary inflorescence stem height (**c** and **e**) and stem diameter (**d** and **f**) in *PbrSTONE*-overexpression *Arabidopsis* lines and wild type (WT) plants. n=6, 12, 9 and 11 biologically independent samples for WT, OE-3, OE-6 and OE-8, respectively. Data presented are mean  $\pm$  SD. *p*-values were determined by two-tailed Student's *t*-test (\*\*\*\**p* < 0.0001; ns, not significant). Source data are provided as a Source Data file.

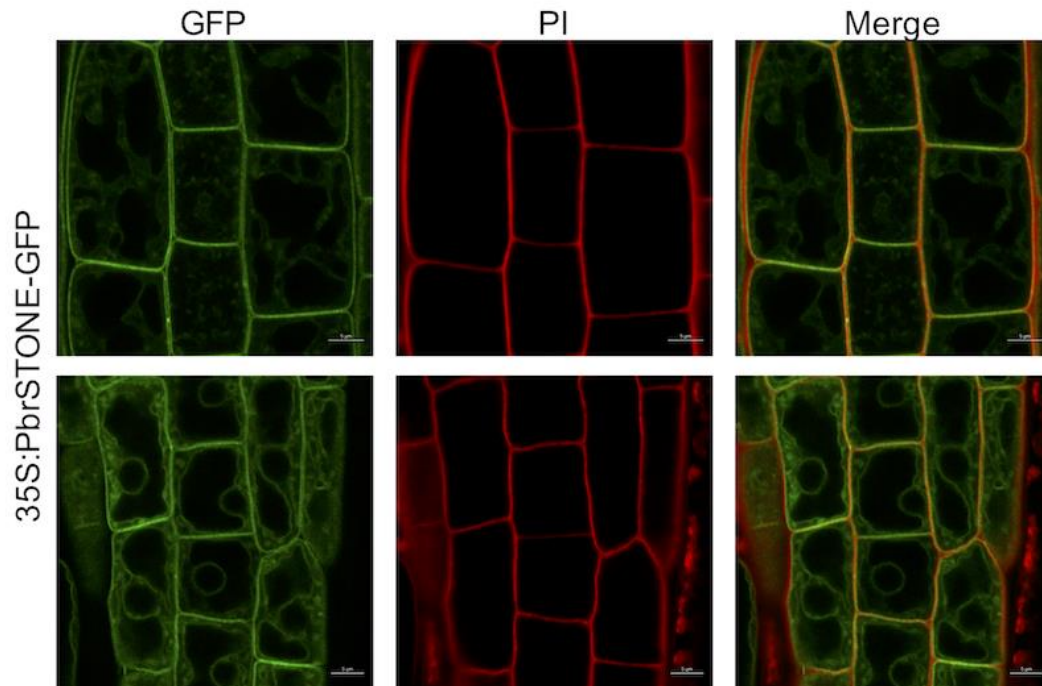

**Supplementary Figure 20.** Subcellular localization of PbrSTONE in transgenic Arabidopsis root. The localization of PbrSTONE protein in cytoplasm and cytomembrane was determined using PbrSTONE-GFP fusion protein. The cell wall was identified with Propidium iodide (PI) staining. The experiment was repeated two times independently with similar results obtained.

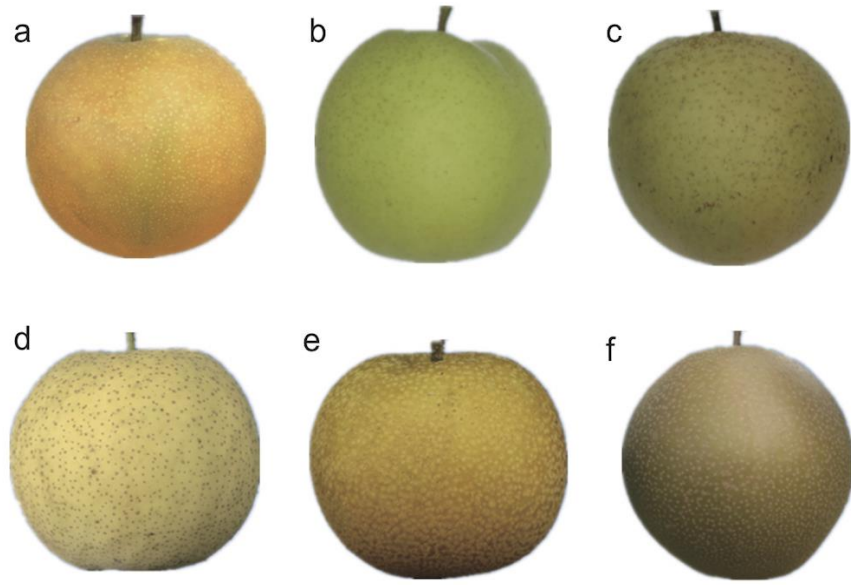

**Supplementary Figure 21.** Diversity of fruit skin color. **a.** '1', Yellow; **b.** '2', Green; **c.** '3', Yellow-green; **d.** '4', Green-yellow; **e.** '5', Yellow-brown; **f.** '6', Brown.

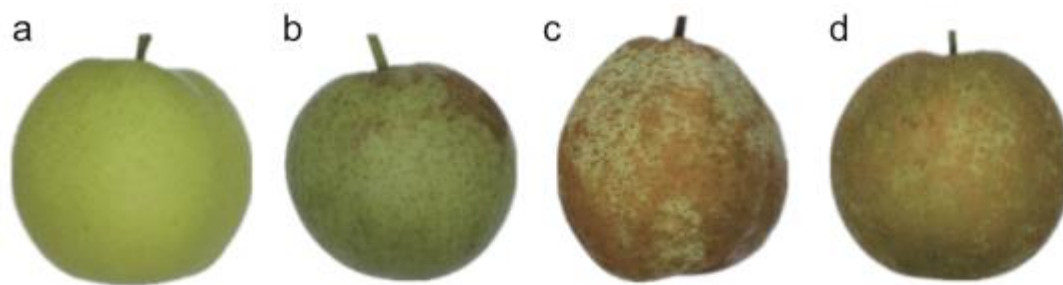

**Supplementary Figure 22.** Different coverage ratio of fruit russet. **a.** '1', ratio < 1/16; **b.** '3':  $1/16 \leq \text{ratio} < 1/8$ ; **c.** '5':  $1/8 \leq \text{ratio} < 1/4$ ; **d.** '7': ratio  $\geq 1/4$ .

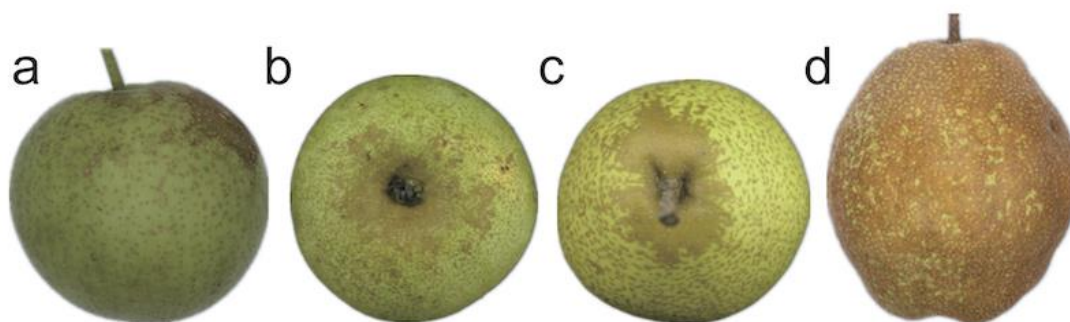

**Supplementary Figure 23.** Different location of fruit russet. **a.** '1', Sunny side; **b.** '2', Sepal side; **c.** '3', Stem side; **d.** '4', Whole fruit.

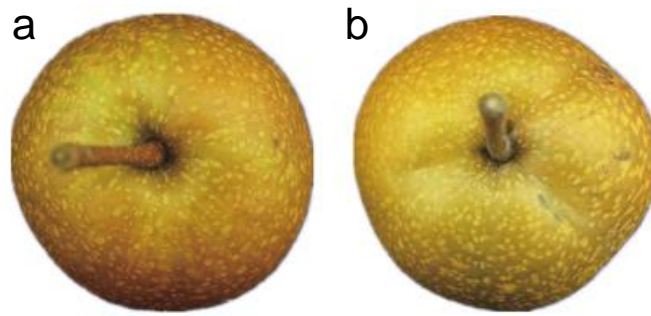

**Supplementary Figure 24.** Furrows on fruit surface. **a.** '0', none; **b.** '1', existence.

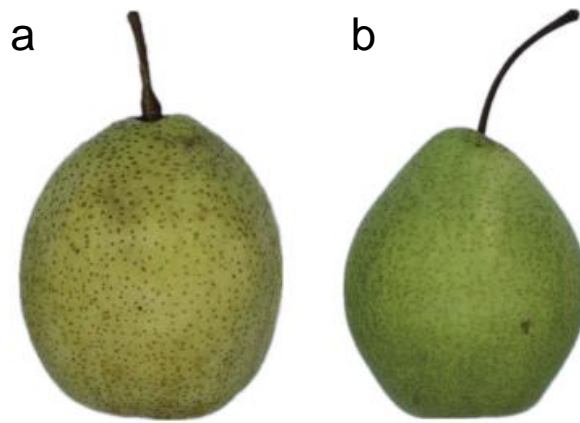

**Supplementary Figure 25.** Different direction of pear carpopodium. **a.** ‘1’, vertical carpopodium; **b.** ‘2’, oblique carpopodium

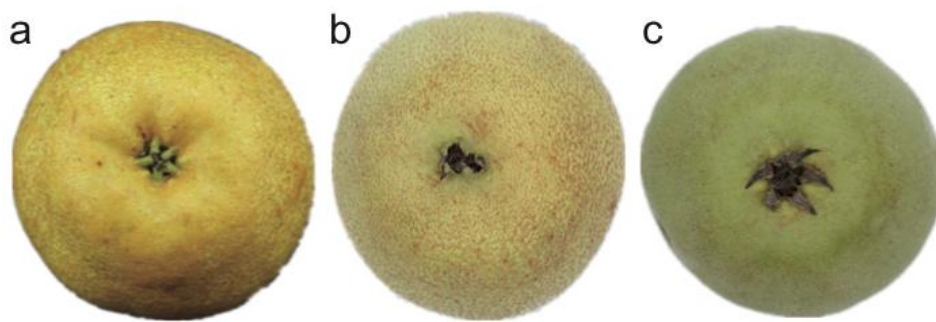

**Supplementary Figure 26.** Different direction of pear sepal. **a.** '1', Sepal get-together; **b.** '2', Vertical sepal; **c.** '3', Radiational sepal.
